# Supplementary material
Source: PubMed Central journal article supplement (PMC3859920)
Supplement: NIHMS55922-supplement-Figure_S2.pdf [file NIHMS55922-supplement-Figure_S2.pdf]

***Orobanche* cluster size distribution (from combined dataset)**

**Read Number**

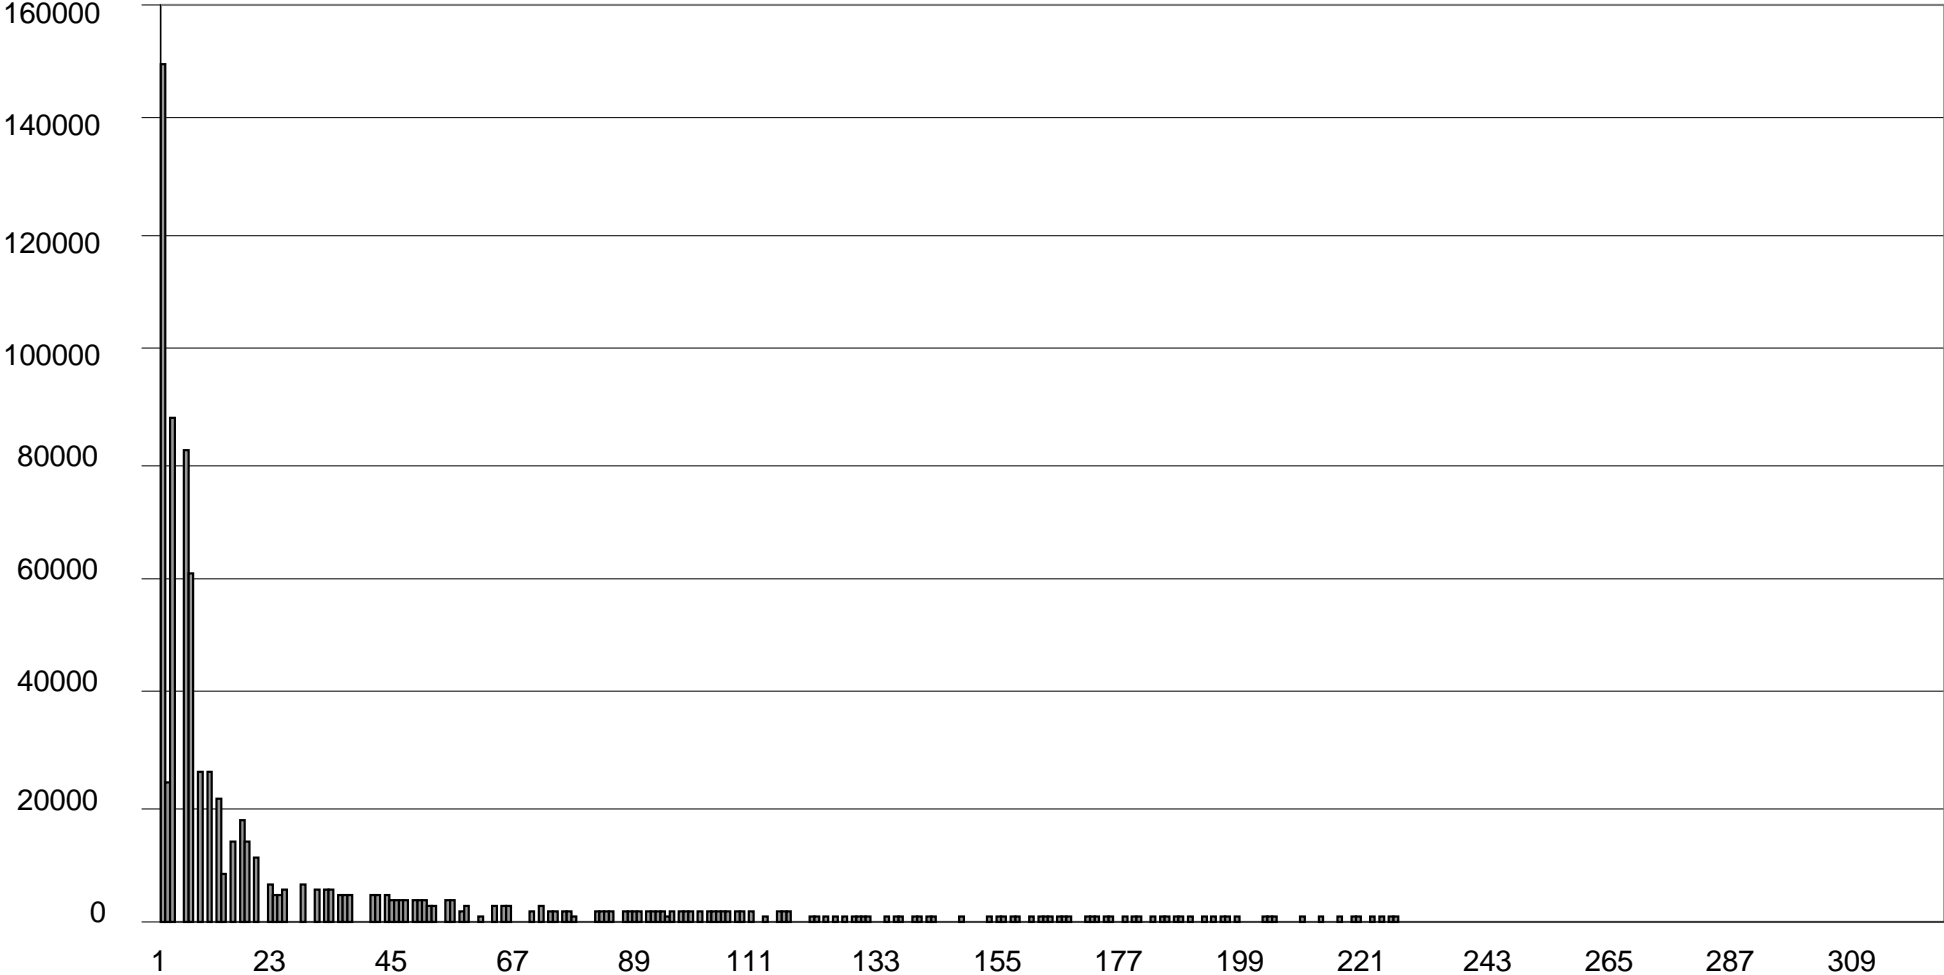

**Cluster rank**

***Phelipanche* cluster size distribution (from combined dataset)**

**Read Number**

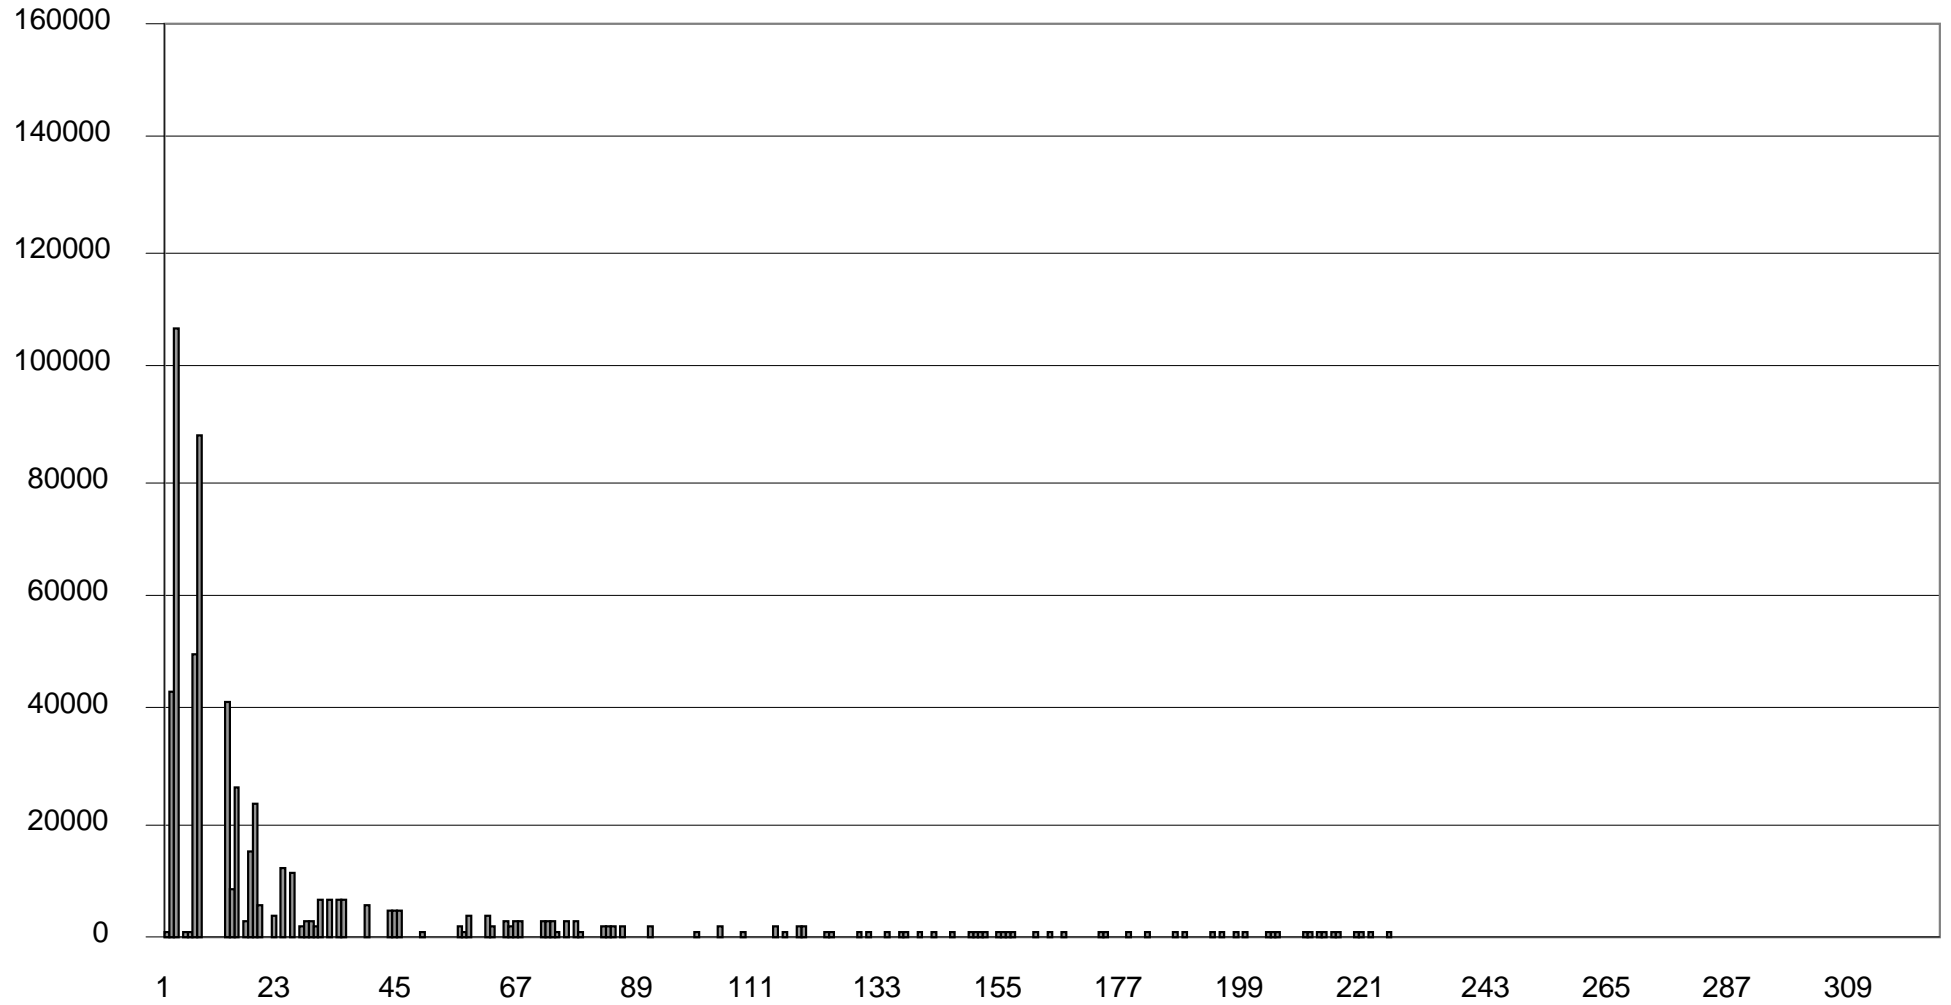

**Cluster rank**

*L. philippensis*

Genomic proportion (%)

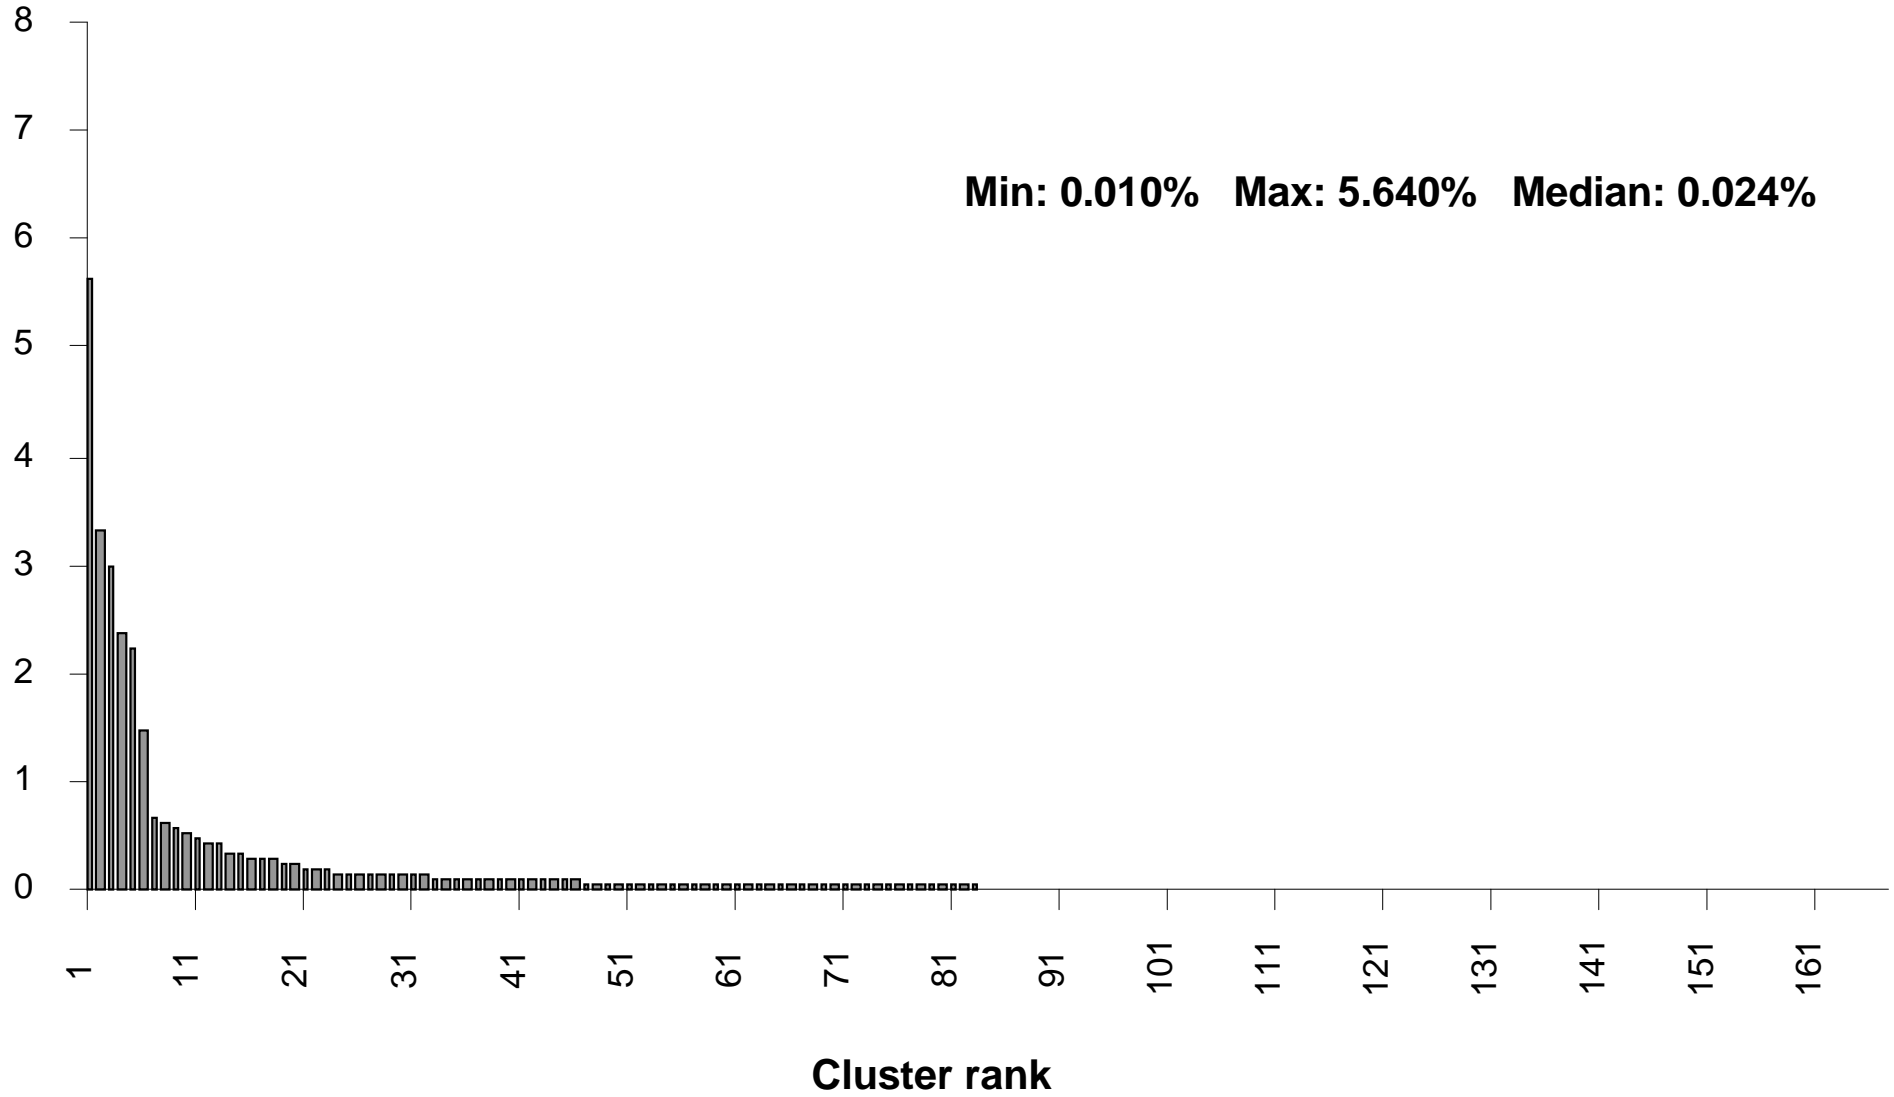

# *S. americana*

Genomic proportion (%)

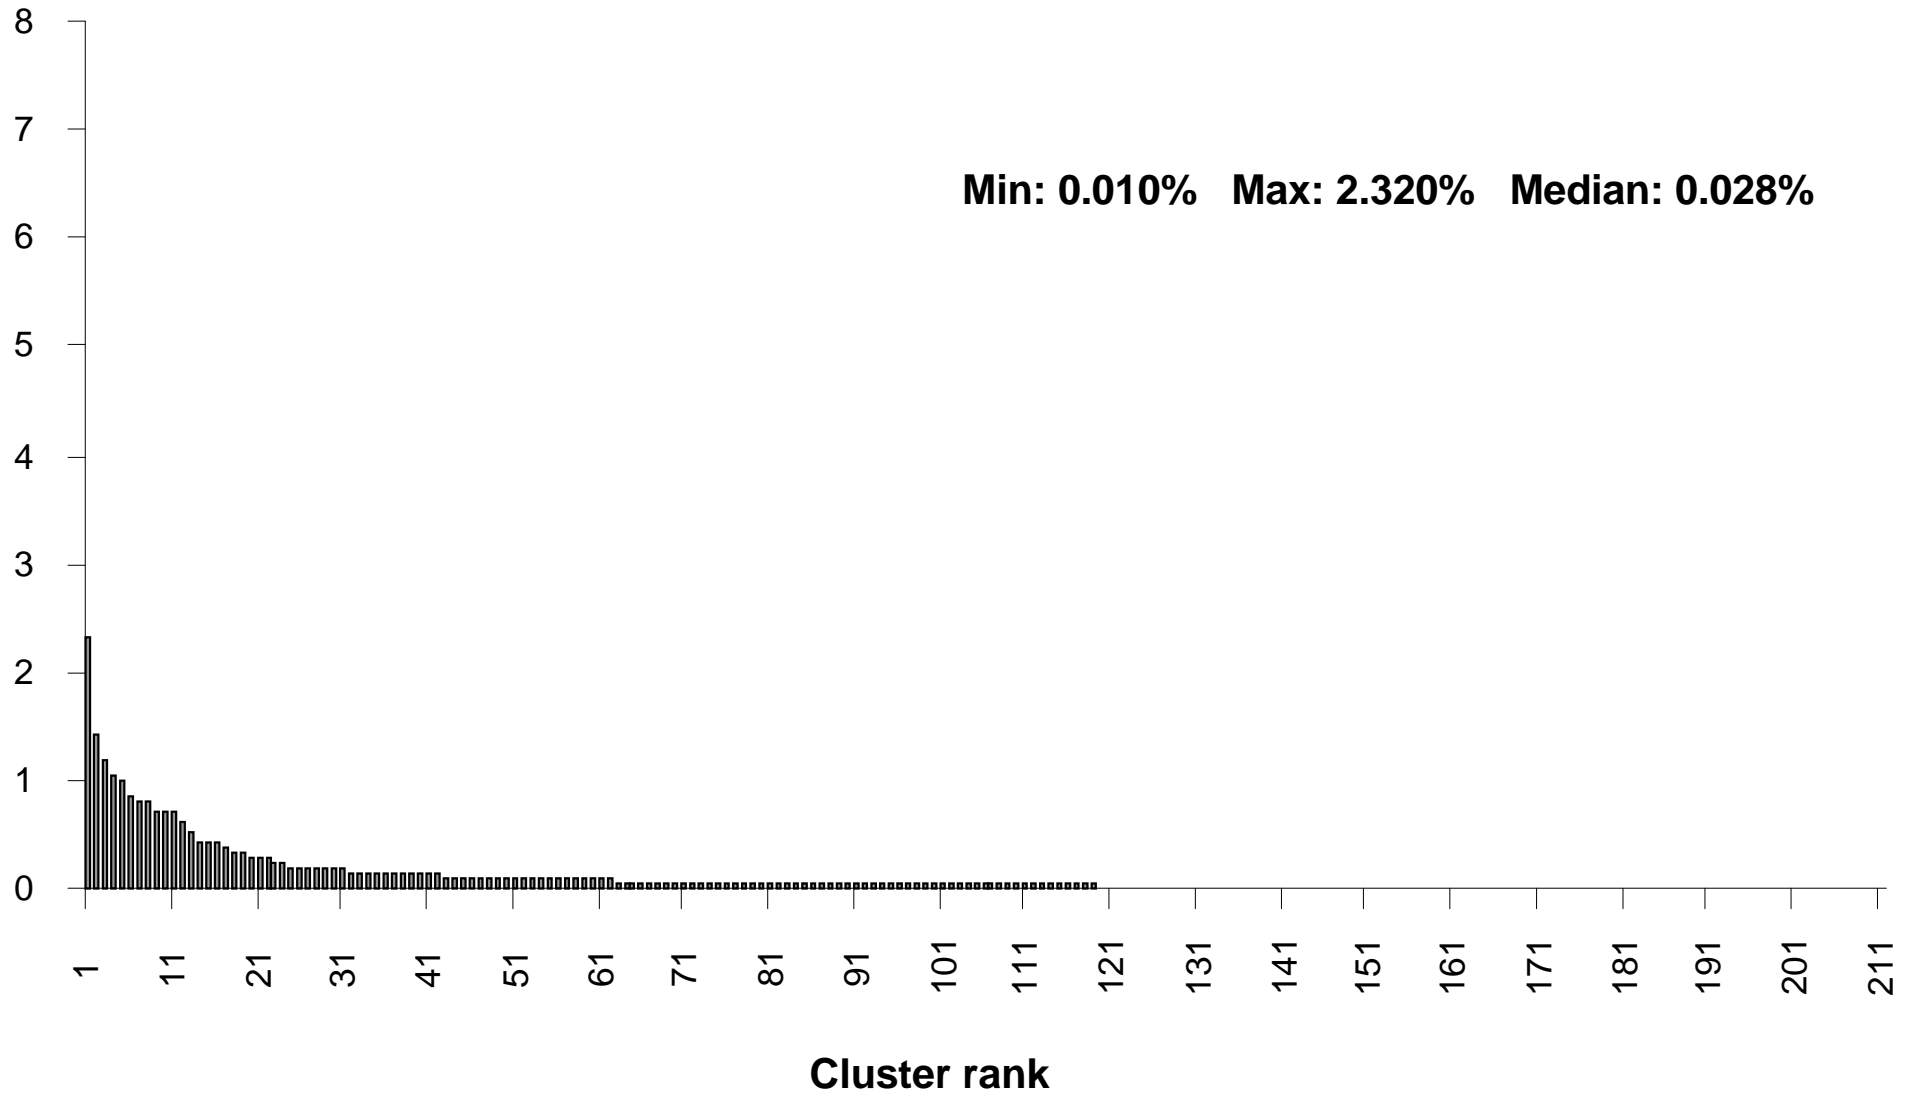

# *O. cumana*

Genomic proportion (%)

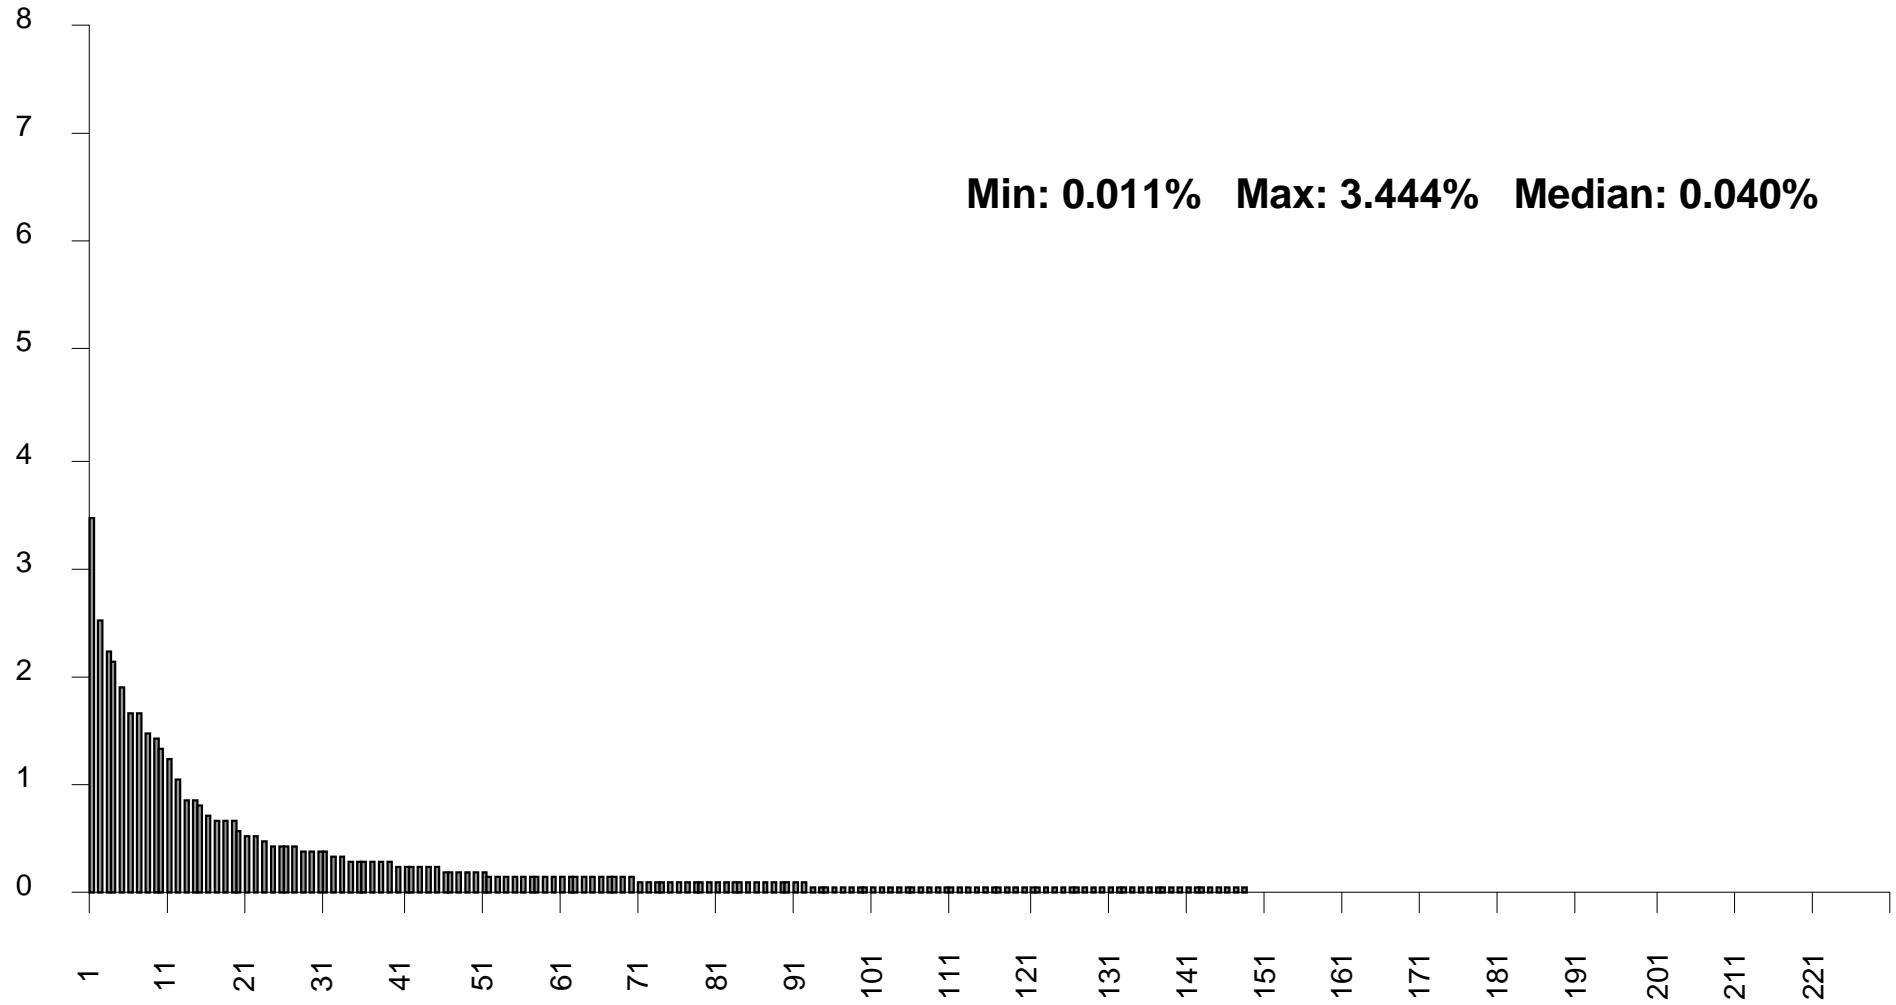

Cluster rank

# *O. gracilis*

Genomic proportion (%)

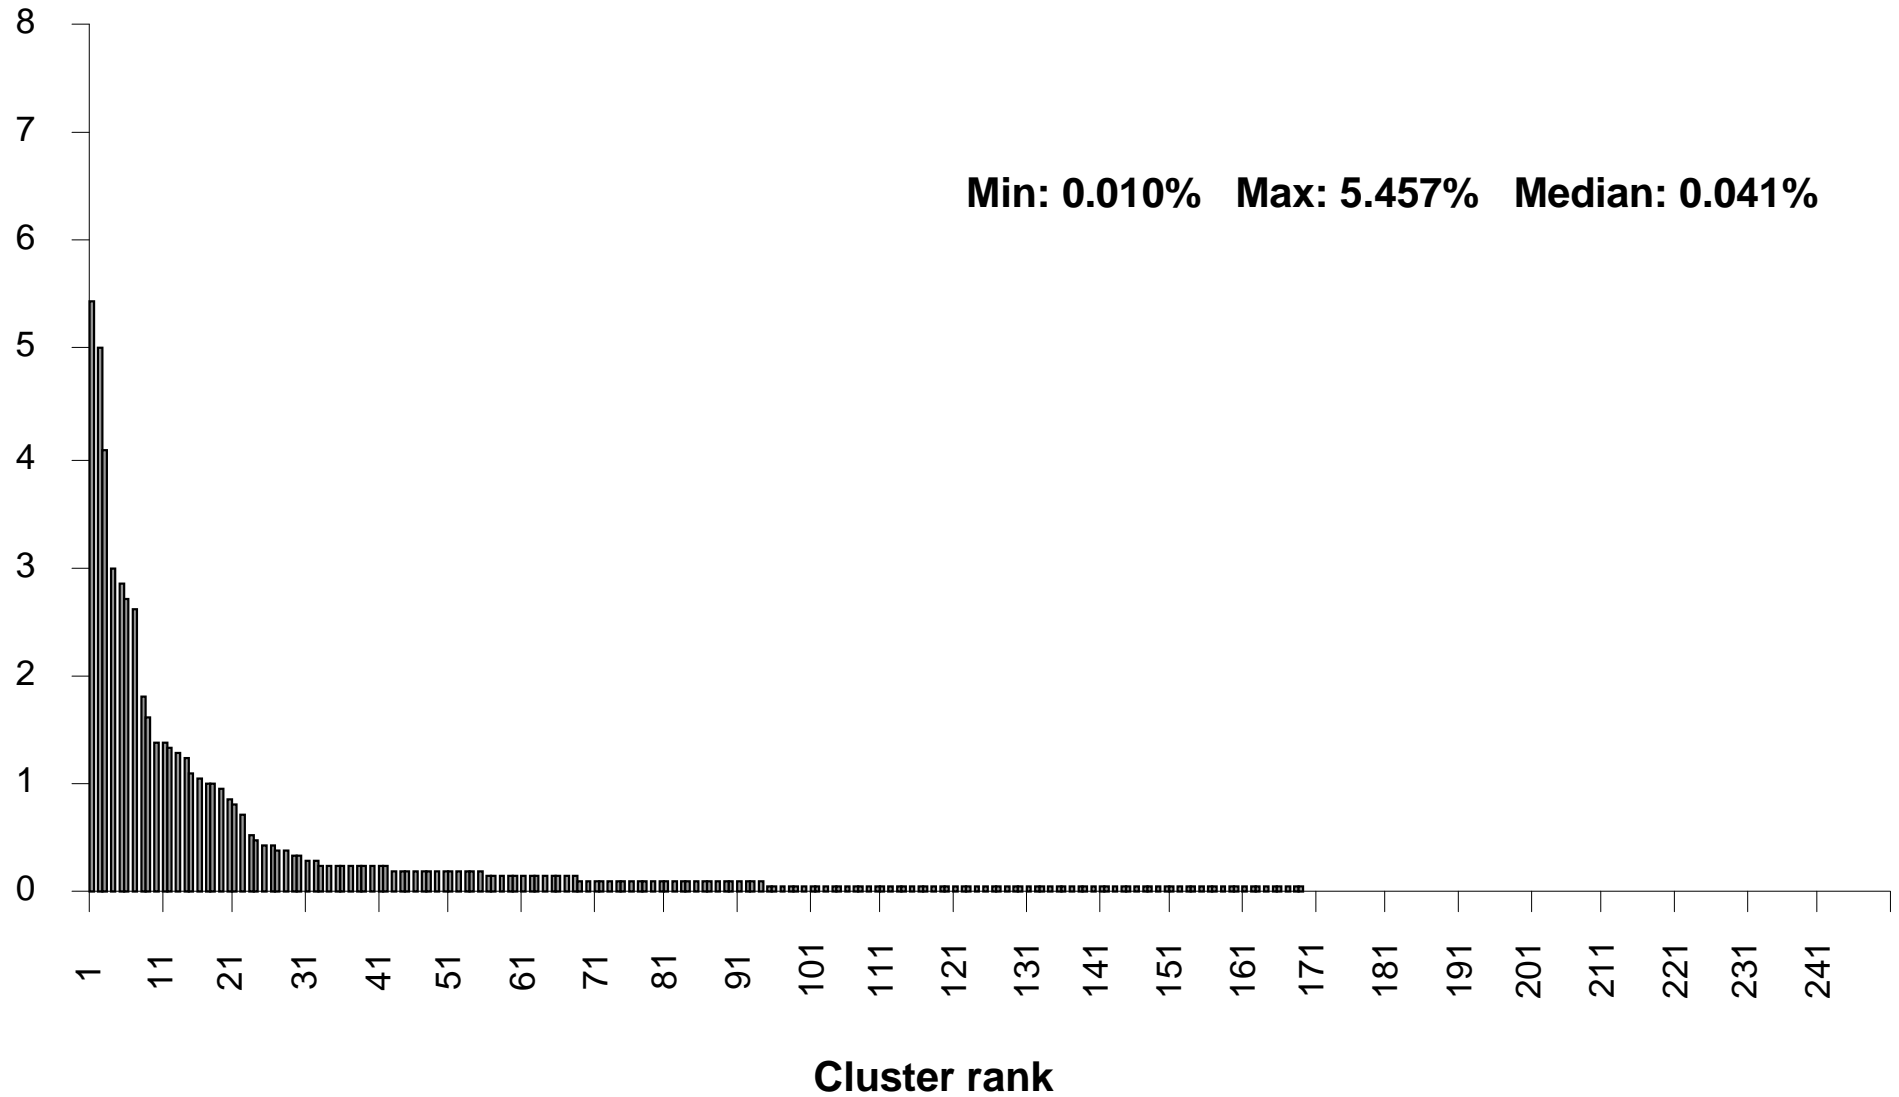

***O. crenata***

**Genomic proportion (%)**

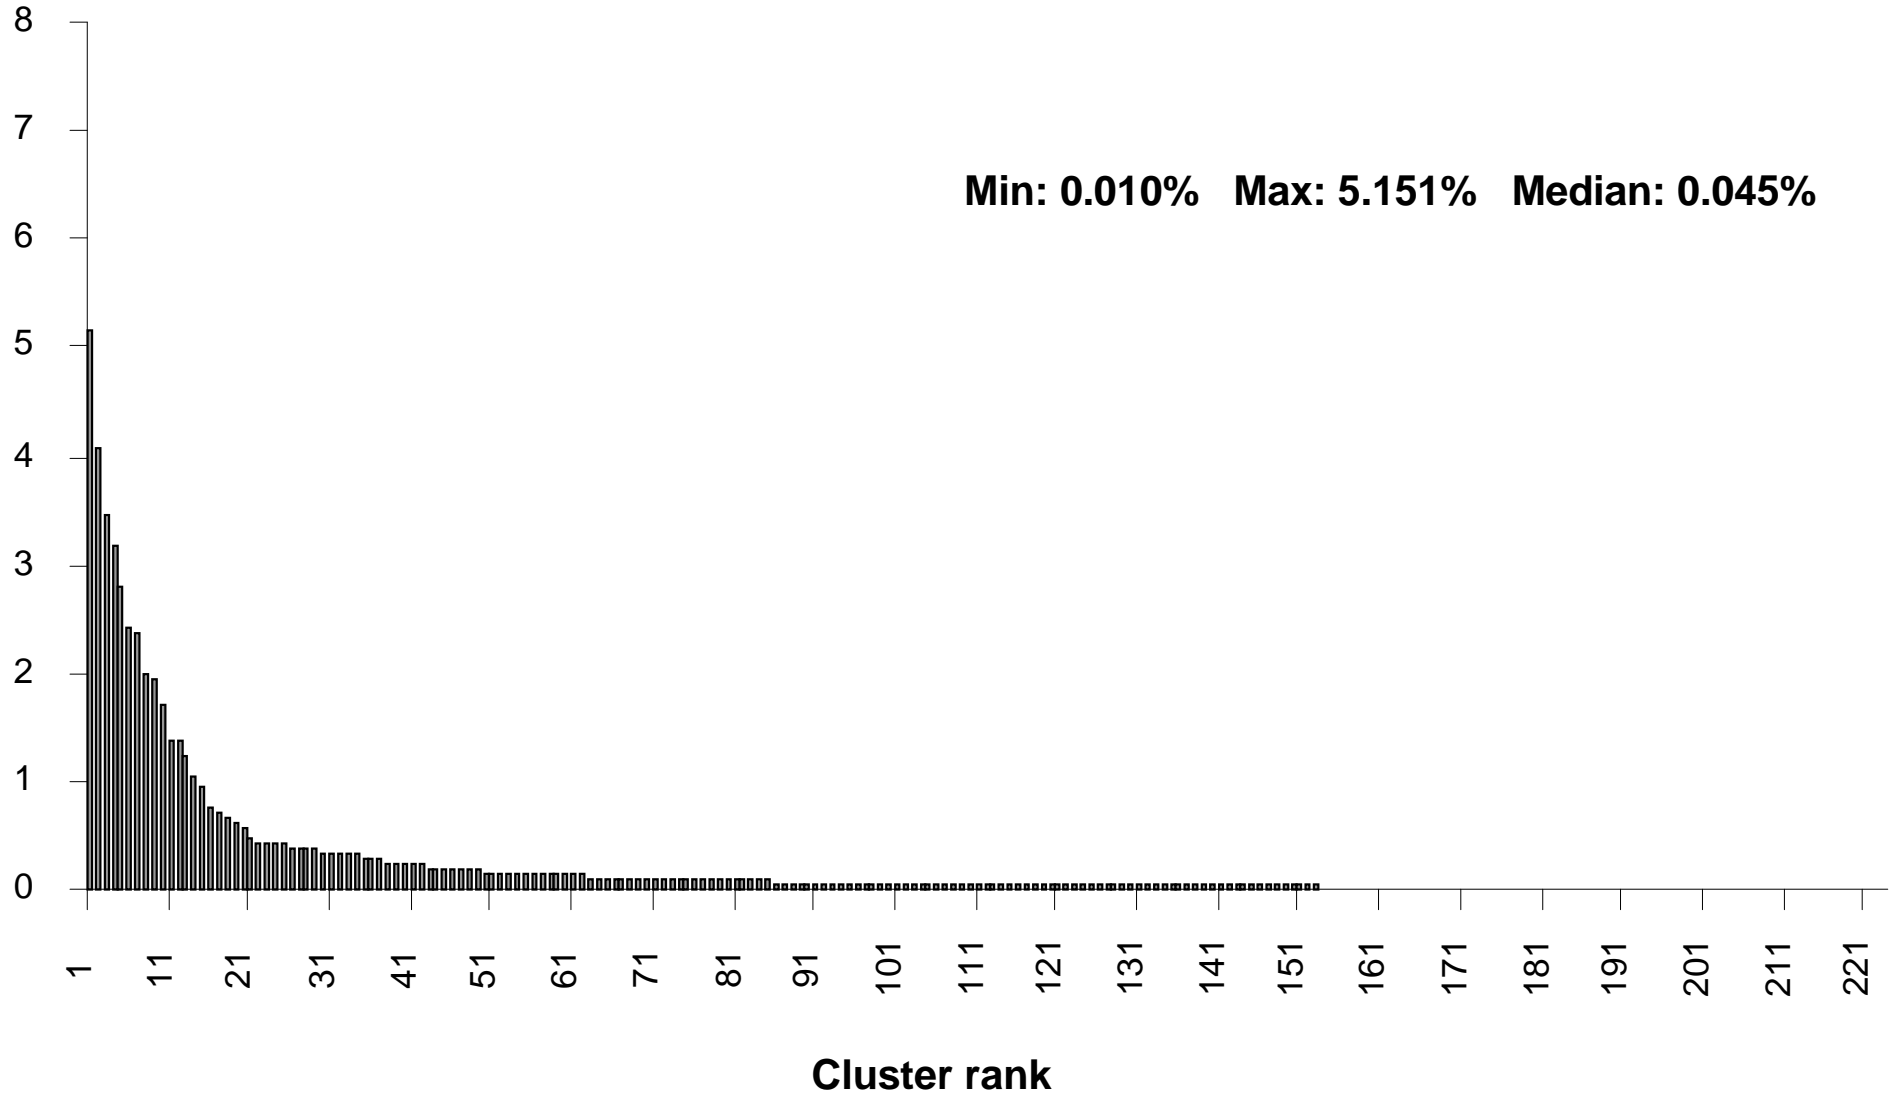

*O. pancicii*

Genomic proportion (%)

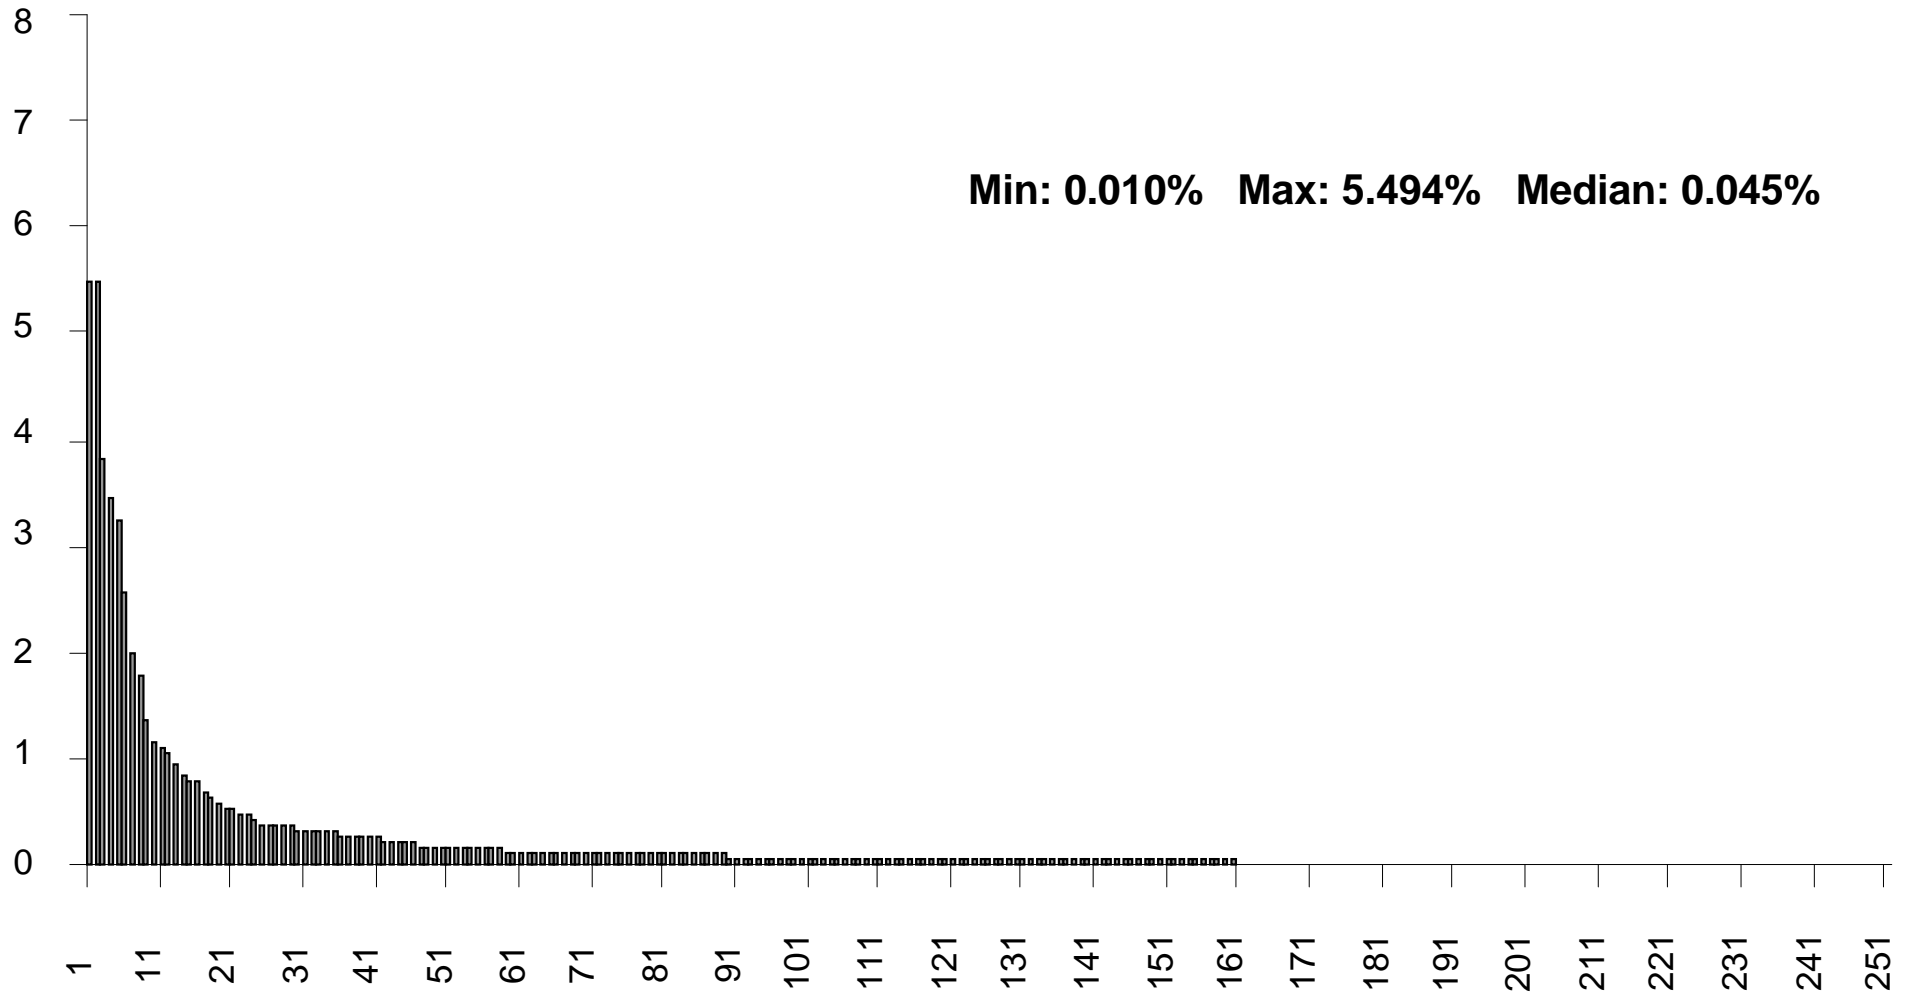

Cluster rank



*P. purpurea*

Genomic proportion (%)

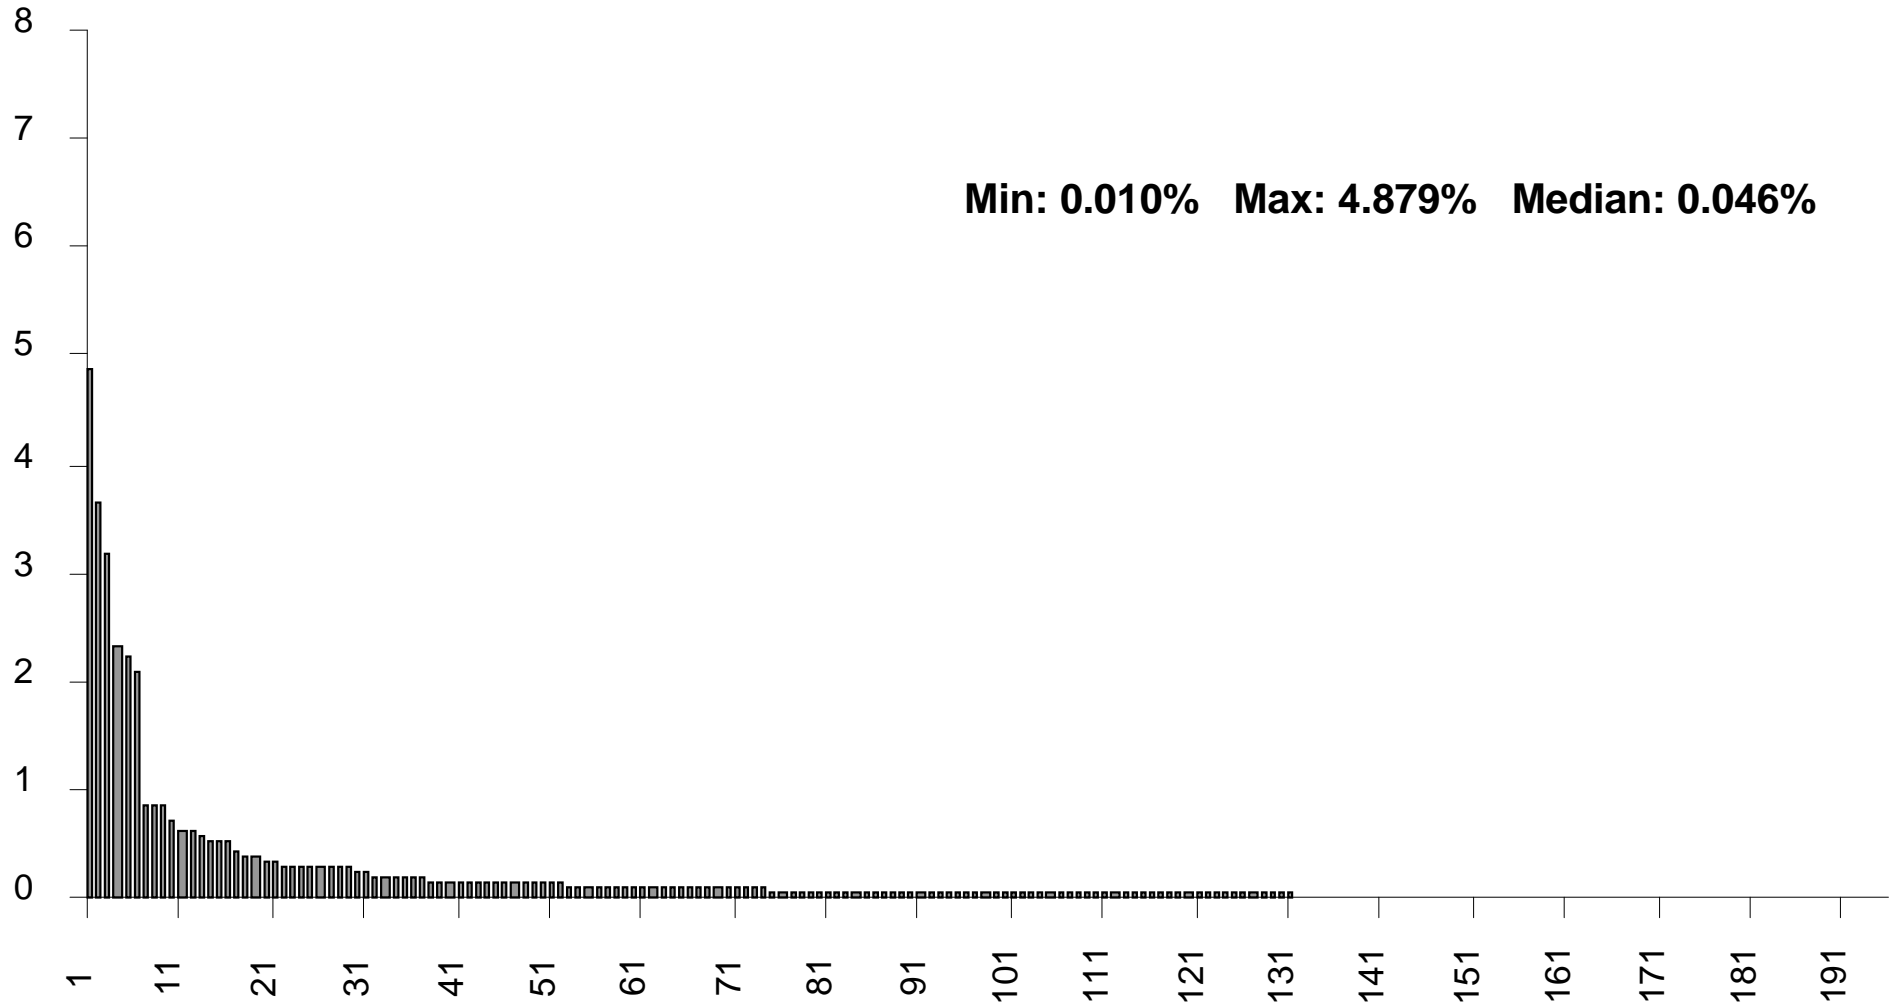

Cluster rank

*P. lavandulacea*

Genomic proportion (%)

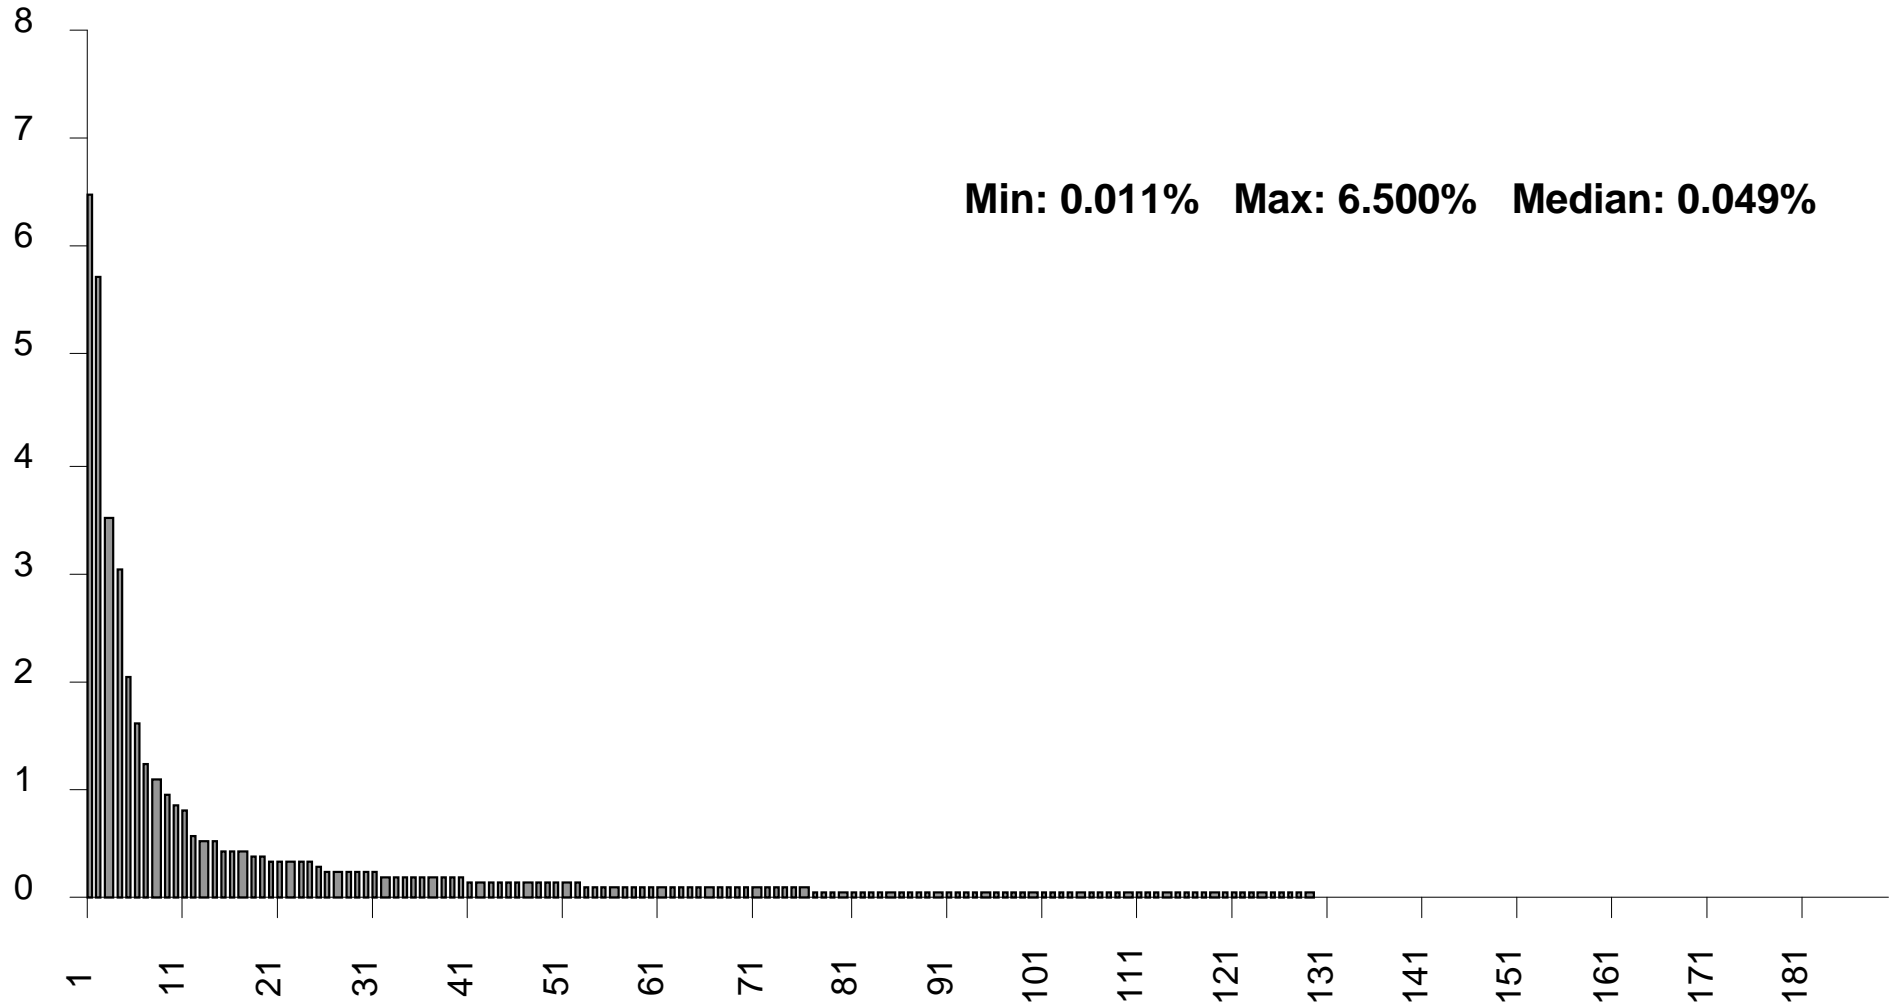

Cluster rank

*P. ramosa*

Genomic proportion (%)

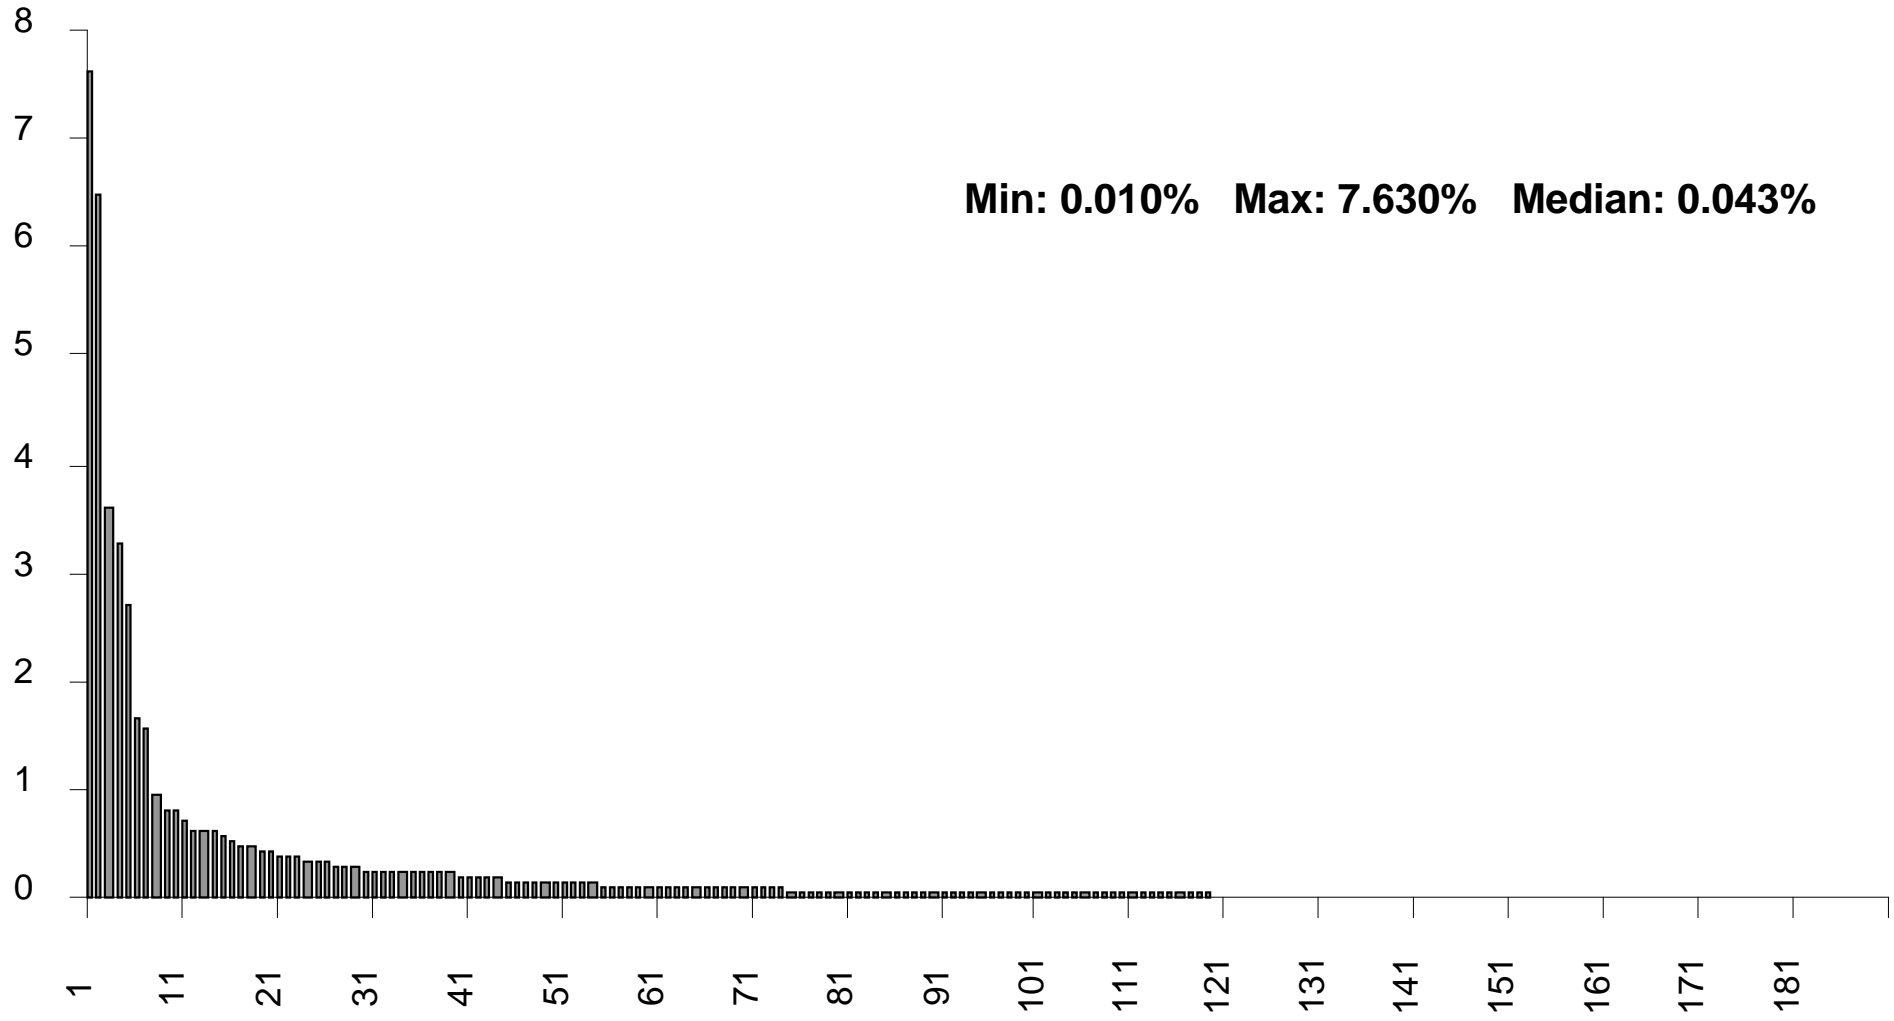

Cluster rank
