# Supplementary material
Source: PubMed Central journal article supplement (PMC3859920)

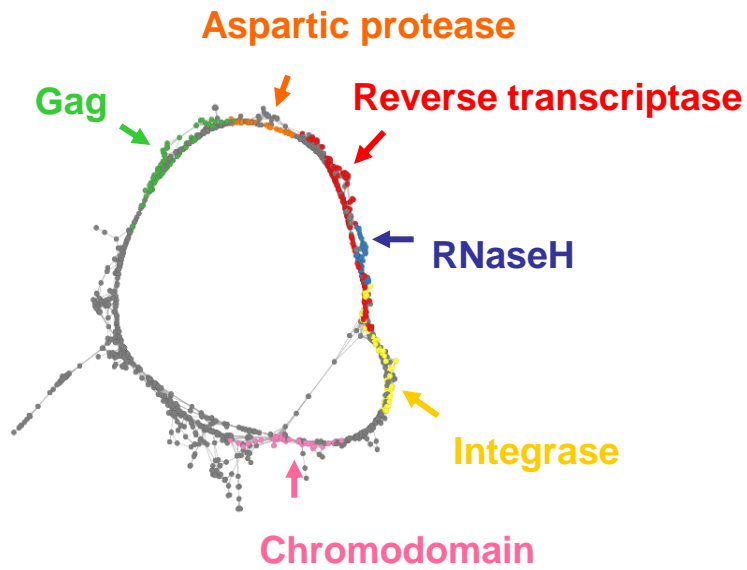

**Ty3/Gypsy element**

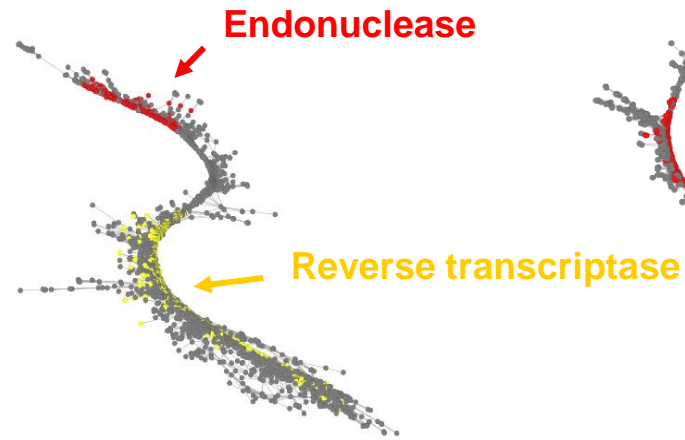

**LINE element**

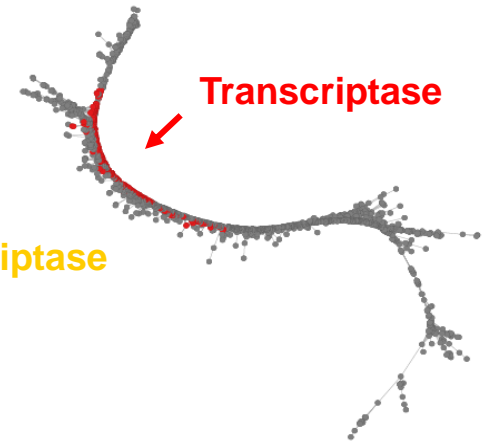

**Mutator element**

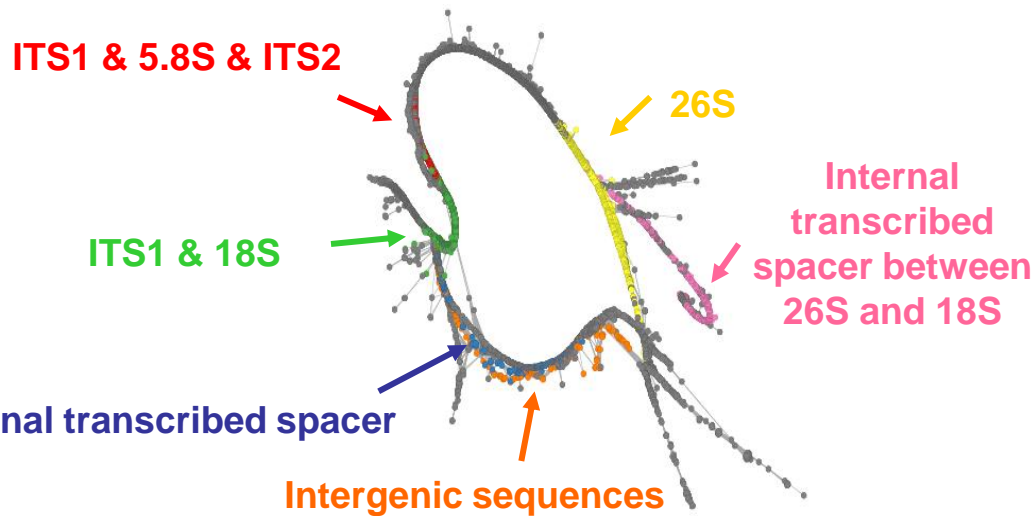

**rDNA**

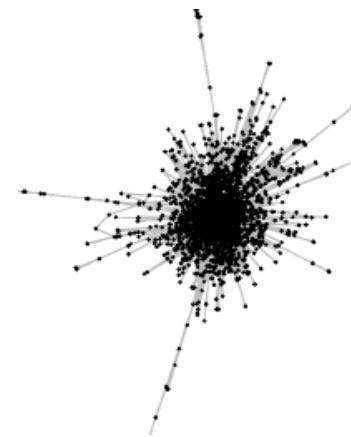

**Satellite**

Supplement: NIHMS55922-supplement-Figure_S1.pdf [file NIHMS55922-supplement-Figure_S1.pdf]
